# Supplementary material for: Free energy of adsorption of water and calcium on the {10 1? 4} calcite surfaceElectronic supplementary information (ESI) available: free energy calculations. See http://www.rsc.org/suppdata/cc/b3/b311928a/
Source: Royal Society of Chemistry journal article supplement (doi:10.1039/b311928a), 2003-12-19
Supplement: b311928a.doc [file b311928a.doc]

Electronic Supplementary Information for:

# Free energy of adsorption of water and calcium on the {10ī4} calcite surface

S. Kerisit and S.C. Parker

*Department of Chemistry, University of Bath, Claverton Down, Bath, UK BA2 7AY.*

## Fax: 01225 386531 Tel: 01225 386505 E-mail:s.c.parker@bath.ac.uk

The simulation of water in contact with the calcite surface was performed in the NVT ensemble (constant number of particles, constant volume and temperature) at 300 K and zero pressure. The calcite slab is about 15 Å thick with a surface area of 24.12x23.98 Å2 and contains 180 calcium carbonate units. The water slab is about 20 Å thick and contains 360 water molecules, which corresponds to the optimised density for this water potential at 300 K and zero pressure, i.e. 1.3 g.cm-3. The simulation was run for 1 ns including an initial equilibration period of 40 ps. The trajectories were generated by the Verlet leapfrog scheme using a timestep of 0.2 fs. The electrostatic interactions were calculated using Smoothed Particle-Mesh Ewald summation1 with a real space cut-off of 8 Å.

We calculated the free energy difference between a water molecule at a height z and a water molecule in the bulk, i.e. at height z0, by integrating the average force in the direction normal to the surface, fz, acting on the whole water molecule from z0 to z: 2

|  | (1) |
| --- | --- |

The water density relative to that in the bulk was obtained according to:

|  | (2) |
| --- | --- |

where n(z) is the number of water molecules with their centre of mass at a height z.

In the series of calculations where the calcium ion is fixed at different heights above the surface, a water molecule is replaced by a calcium atom and the simulation is performed using the same conditions as described above for 100 ps with an equilibration period of 10 ps. Fifty calculations were performed to obtain the average force acting on the calcium ion between z=2.5 Å and z=10 Å. Then, the free energy profile of the calcium ion approaching the surface was calculating using equation (1).

If we define the reaction coordinate as being the distance between the calcium ion and the mineral surface, the desorption rate constant can be written as:3

|  | (3) |
| --- | --- |

where kTST is the transition state rate constant:

|  | (4) |
| --- | --- |

where μ is the reduced mass and r* the transition state distance. The transmission coefficient κ is determined from the plateau value of the normalised reactive flux, which can be computed as:

|  | (5) |
| --- | --- |

where θ[x] is the Heaviside function, which is 1 if x is larger than 0 and 0 otherwise and is the initial calcium ion velocity along the reaction coordinate. The subscript c means that the initial configurations have been generated in the constrained reaction coordinate ensemble. We first performed 50 calculations where the calcium ion is fixed at the transition state distance. Each calculation is run for 60 ps after an equilibration period of 2 ps and a configuration is recorded every 2 ps. Each configuration is then run forward and backward in time for 1.4 ps generating 3000 different trajectories to be used to determine k(t).

References

1. Essmann et al., *J.Chem. Phys.*, 1995, **103**, 8577.
2. Marrink and Berendsen, *J. Phys. Chem.*, 1996, **100**, 16729.
3. Rey and Guàrdia, *J. Phys. Chem.,* 1992, **96**, 4712.
